# Supplementary material for: Microdeletion in a FAAH pseudogene identified in a patient with high anandamide concentrations and pain insensitivity
Source: PubMed Central journal article supplement (PMC6676009; doi:10.1016/j.bja.2019.02.019), 2019-03-28
Supplement: mmc8.pdf [file mmc8.pdf]

**A****Fig. S7****68% identity**

**FAAH** 476 GGCCTGCTCTATGGCGTCCCTGTGAGCCTCAAGGAGTGCTTCACCTACAAGGGCCAGGAC  
 ||||| ||||| ||||| ||||| ||||| ||||| || || | || ||||| |||

**FAAH-OUT** 1363 GGCCTTCTCTATGGGGTCCCCATGAGCCTCAAGGACACCTATGACAGCATGGGCCATGAC

**FAAH** 536 TC--CACGC----TGGGCTTGAGCCTGAATGAAGGGGTGCCGGCGGAGTGCACAGCGTA  
 | | | | | | | | | | | | | | | | | | | | | | | | | | | | | |

**FAAH-OUT** 1423 TGTGCATGCCGCCTGGCCTAGTTCTGGA-GAAGCC-TGC-GACCAAG---GACGGGGTC

**FAAH** 590 GTGGTGCATGTGCTGAAGCTGCAGGGTGCCGTGCCCTTCGTGCACACCAATGTTCCACAG  
 | | | | | | | | | | | | | | | | | | | | | | | | | | | | | |

**FAAH-OUT** 1477 ATTATGAAAGTGCTCAAGGCCAAGGAGCCATCCCCTTTGTTAAGACCAACATCCCCTG

**FAAH** 650 TCCATGTTTCACTATGACTGCAGTAACCCCC-TCTTTGGCCAGACCGTGAACCCATGGAA  
 | | | | | | | | | | | | | | | | | | | | | | | | | | | | | |

**FAAH-OUT** 1537 ACGCTGCTCAGCTTTGAATGCGGCAACTCCCCTCTATGGCCAGATGTTGAGCCCCTGAA

**FAAH** 709 GTCCTCCAAAAGCCCAG--GGGGCTCCT**CAGGGG**GTGAAGGGGCCCTCATCGGGTCTGGA  
 | | | | | | | | | | | | | | | | | | | | | | | | | | | | | |

**FAAH-OUT** 1597 CT--TAAAGAAGACATGTGGGGCTCCT**CAGGGG**GTGA-GGGGCTCTGCTGGCAGAAAGG

**FAAH** 767 GGCTCCCCCTGGGCTTAGGCACTGATATCGGAGGCAGCATCCGCTTCCCCTCCTCCTTC  
 | | | | | | | | | | | | | | | | | | | | | | | | | | | | | |

**FAAH-OUT** 1654 GGGTCCATCCTAGGCATGGGTACTGACACAGGTGACAGCATCTGCATACCAGCCAGCTTC

**FAAH** 827 TGCGGCATCTGCGGCCTCAAGCCCACAGGGAACCGCCTCAGCAAGAGTGGCCTGAAGGGC  
 | | | | | | | | | | | | | | | | | | | | | | | | | | | | | |

**FAAH-OUT** 1714 TGTGGTGTTTATGGCCTCTGGACCACAGGTTCCCGCCTCAGCTACACTGGAATT---GCC

**FAAH** 887 TGTG---TCTATGG-ACAGGAGGCAGTGCCTCTCTCCGTGG---GCCCATGGCCCCGGA  
 | | | | | | | | | | | | | | | | | | | | | | | | | | | | | |

**FAAH-OUT** 1771 TCTGCCATCAAGGGGAAAAAATCGGTGAC---CACGGTGGCTGGCCCCATGGCCCCAGGA

**FAAH** 940 CGTGGAGAGCCTGGCACTGTGCCTGCGAGCCCTGCTGTGCGAGGACATGTTCCGCTTGGA  
 | | | | | | | | | | | | | | | | | | | | | | | | | | | | | |

**FAAH-OUT** 1828 CGTGGAGAGCCTGGCGCTGTGCCTGCAAGCCCTGCTGAGTGAAGACATGTACCGACTGGA

**FAAH** 1000 CCCC**CTGTGC**CTCCCTTGCCCTTCAGAGAAGAGGT  
 | | | | | | | | | | | | | | | | | | | | | | | | | | | | | |

**FAAH-OUT** 1888 CCCC**CTGTGC**TCCAGATGCCCTTTAGGGAGGAGGT

**71% identity**

**FAAH** 1568 CTGTACAACCTGCCTGGACTTCCCTGCAGGGGTGGTGCCTGTCCACCGGTGACTGCTGAG  
 | | | | | | | | | | | | | | | | | | | | | | | | | | | | | |

**FAAH-OUT** 2216 CTGTACAACCTCCTGGACTTCCCGCGGGCGTGGTGCCTGTCACTATCGTGACACTACAG

**FAAH** 1628 GACGAGGCCCAGATGGAACATTACAGGGGCTACTTTGGGGATA--TCTGGGACAAGATGC  
 | | | | | | | | | | | | | | | | | | | | | | | | | | | | | |

**FAAH-OUT** 2276 GACGAGGAGGAACCTGGCCTTCTACAAGGGGTGCTACGGAGATAGTTCTGACAAAAATTC

**FAAH** 1686 TGCAGAAGGGCATGAAGAAGA-GTGTGGGGCTGCCGGTGGCCGTGCAGTGTGTGGCTCTG  
 | | | | | | | | | | | | | | | | | | | | | | | | | | | | | |

**FAAH-OUT** 2336 T-CAGA--GGCGTAAGAGGATCCGTCCGACTTCTGGTACTGTGCAGTGCATTGCTTTG

**FAAH** 1745 CCCTGGCAAGAAGAGTTGTGTCTGCGGTTTCATGCGGGAGGTGGA  
 | | | | | | | | | | | | | | | | | | | | | | | | | | | | | |

**FAAH-OUT** 2393 CCATGGGAAGAGGAGCTGTGTCTCCGGTTTCATGAAGGAGGTGGA
