# Supplementary material for: Microdeletion in a FAAH pseudogene identified in a patient with high anandamide concentrations and pain insensitivity
Source: PubMed Central journal article supplement (PMC6676009; doi:10.1016/j.bja.2019.02.019), 2019-03-28
Supplement: mmc9.pdf [file mmc9.pdf]

B

MLSPVCFLPLLDTSFCGFLAIWSSHSLTPKKLWEQHTAVEEYEQEFIAKWR  
 SLDDLVDLLVLPVLGSAFYIGSSSLASESQSYVTLYNLLDFPAGVVPVTIVT  
 LQDEEELAFYKGCYGDSSDKNFSEAVRGSVGLLVTVQCIALPWEELCLR  
 FMKEVDTLVKNQRGPK

C

69% homology

|                 |     |                                                                                                                           |
|-----------------|-----|---------------------------------------------------------------------------------------------------------------------------|
| <b>FAAH</b>     | 438 | SRSAGKLWELQHEIEVYRKTVIAQWRALDDLVDVLTPLAPALDLNAPGRATGAVSYTMLY<br>S + KLWE +E Y + IA+WR+LDDLVD+L P+L A + + A+ + SY LY       |
| <b>FAAH-OUT</b> | 25  | SLTPKKLWEQHTAVEEYEQEFIAKWRSLDDLVDLLVLPVLGSAFYIGSSSLASESQSYVTLY                                                            |
| <b>FAAH</b>     | 498 | NCLDFPAGVVPVTTVTAEDEAQMEHYRGYFGDIWDKMLQKGMKKS VGLPVAVQCVALPWQ<br>N LDFPAGVVPVT VT +DE ++ Y+G +GD DK + ++ SVGL V VQC+ALPW+ |
| <b>FAAH-OUT</b> | 85  | NLLDFPAGVVPVTIVTTLQDEEELAFYKGCYGDSSDKNFSEAVRGSVGLLVTVQCIALPWE                                                             |
| <b>FAAH</b>     | 558 | EELCLRFMREVERLMTPEK<br>EELCLRFM+EV+ L+ ++                                                                                 |
| <b>FAAH-OUT</b> | 145 | EELCLRFMKEVDTLVKNQR                                                                                                       |
