# Supplementary material for: Microdeletion in a FAAH pseudogene identified in a patient with high anandamide concentrations and pain insensitivity
Source: Br J Anaesth. 2019 Mar 28;123(2):e249–53. doi: 10.1016/j.bja.2019.02.019 (PMC6676009; doi:10.1016/j.bja.2019.02.019)

Fig. S5

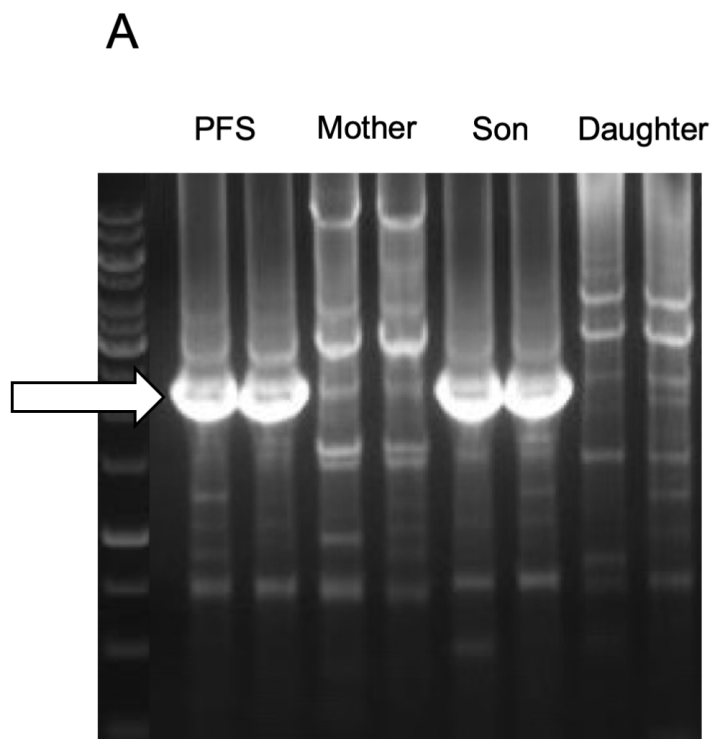

**C**

```

TTCtttttttttttCGAGACGGAGTTTCGCTCTTGTTGTGCAGGCTGGAGTGCAATGGCG
| | | | | | | | | | | | | | | | | | | | | | | | | | | | | | | | | | | |
TTTTTTTTTTTTTTTGGAGACGGAGTTTCGCTCTTGTTGCCAGGCTGGAGTGCAATGGCA

AGATCTCAGCTCACTGCAACCTCTGCCTACCGGATTCAAGTGATTCTCCTGCCTCAGCCT
| | | | | | | | | | | | | | | | | | | | | | | | | | | | | | | | | |
TGATCTCGGCTCACCGCAACCTCCGCCTCCCAGATTCAAGCAATTCTCCTATCTCAGCCT

CCCGAGTATCTGGGATTACAGGCGTGTGCCACCATGCCCAGCTAATTTTGTATTTTGTAGT
| | | | | | | | | | | | | | | | | | | | | | | | | | | | | | | | | |
CCCAAGTAGCTGGGATTACAGGCATGCACCACCACGCCAGCTAATTTTGTATTTTGTAGT

AGAGATGGGATTTCTCCATGTTAGTCAGGCTGGTCTTGAACCTCCTGACCTCAGGTGATCT
| | | | | | | | | | | | | | | | | | | | | | | | | | | | | | | | | |
AGAGATGGGGTTTCTCCATGTT-G--AGGCTGGTCTCGAACTCCTGACCTCAGGTGATCT

GCCTGCCTTGGCCTCCCAAAGTGCTGGGATTACAGGCGTGAGCCACTGTGCCCCGGCCT
| | | | | | | | | | | | | | | | | | | | | | | | | | | | | | | | | |
GCCACCTCGGCCTCCCAAAGTGCTGGGATTACAGGCGTAAGTACCAGCGCCCCGGCCT

```

**B**

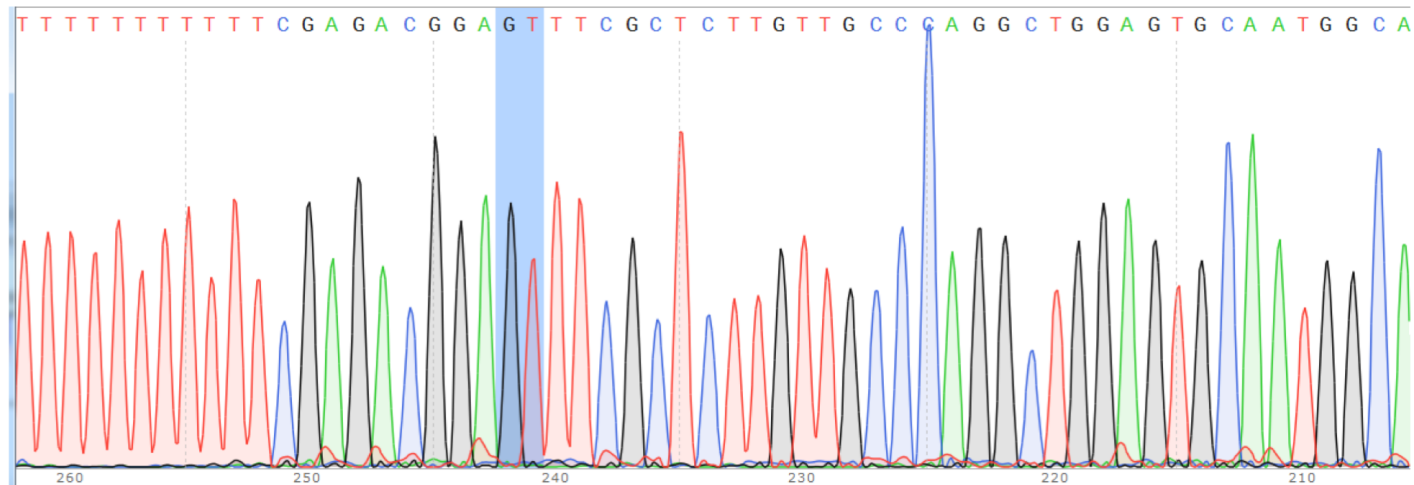

Supplement: Multimedia component 6. [file mmc6.pdf]
